# Supplementary material for: Insights about the Sources of PM2.5 in an Urban Area from Measurements of a Low-Cost Sensor Network
Source: MDPI journal article supplement (doi:10.3390/atmos13030440), 2022-03-09
Supplement: s1 [file s1]

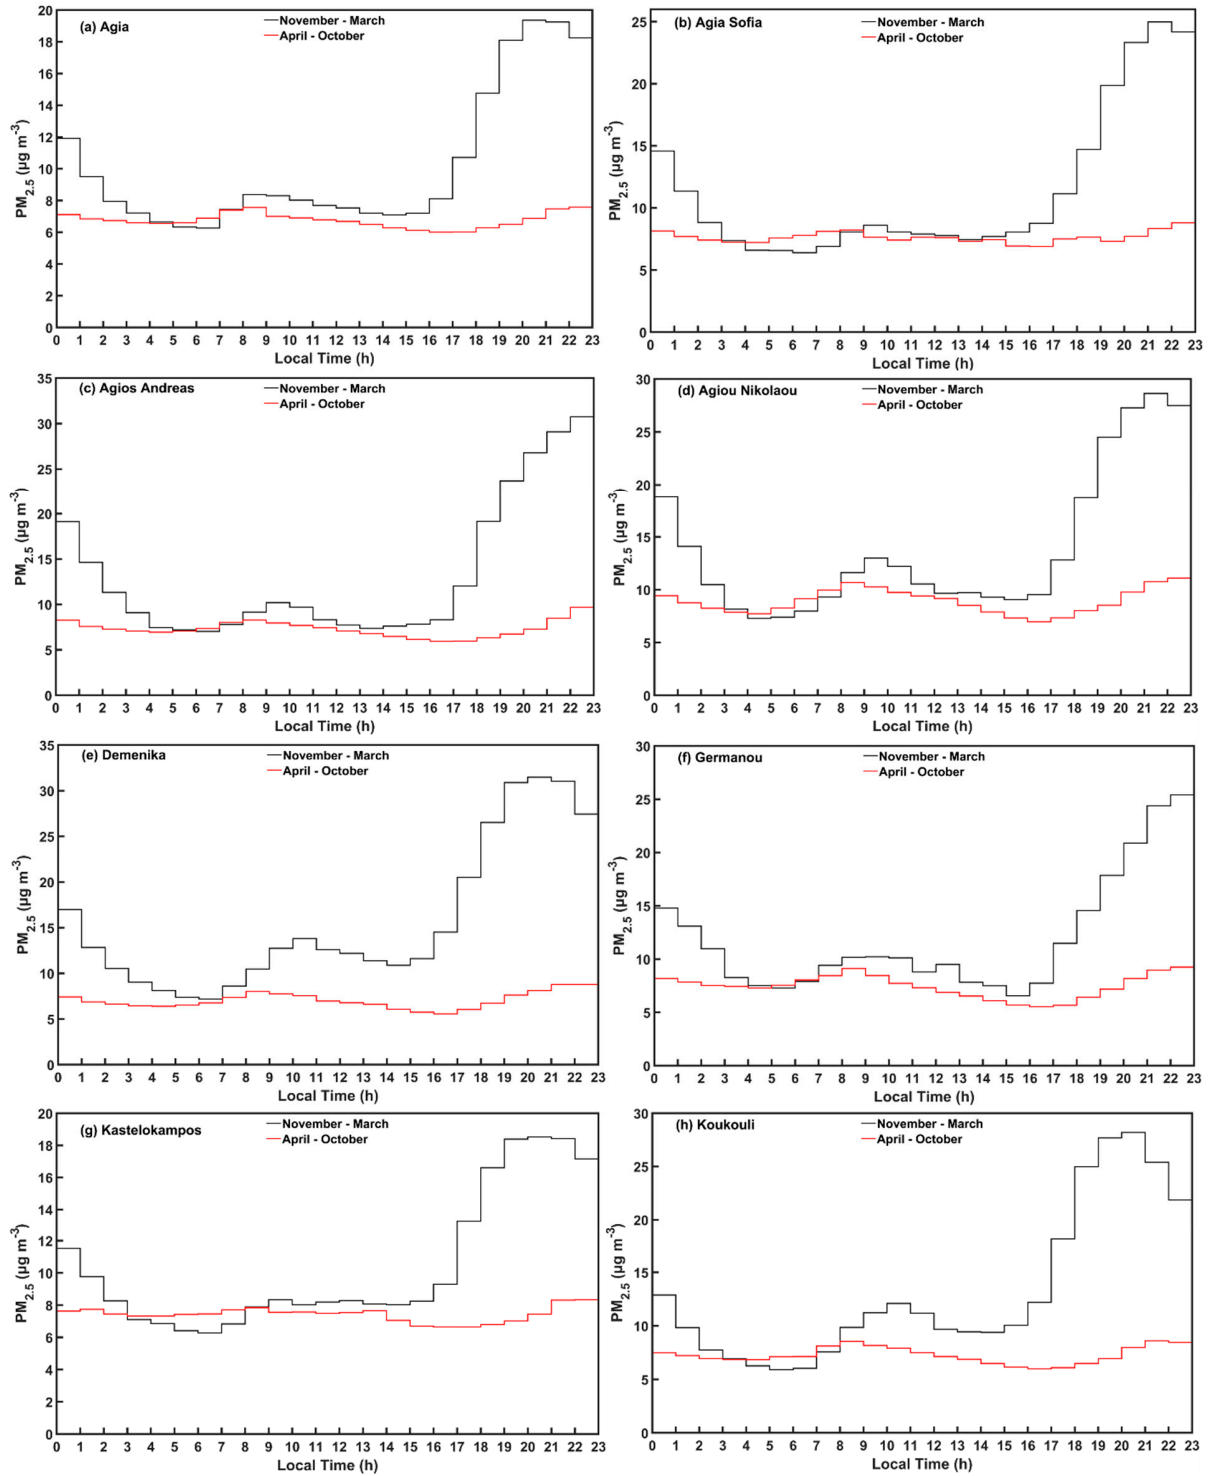

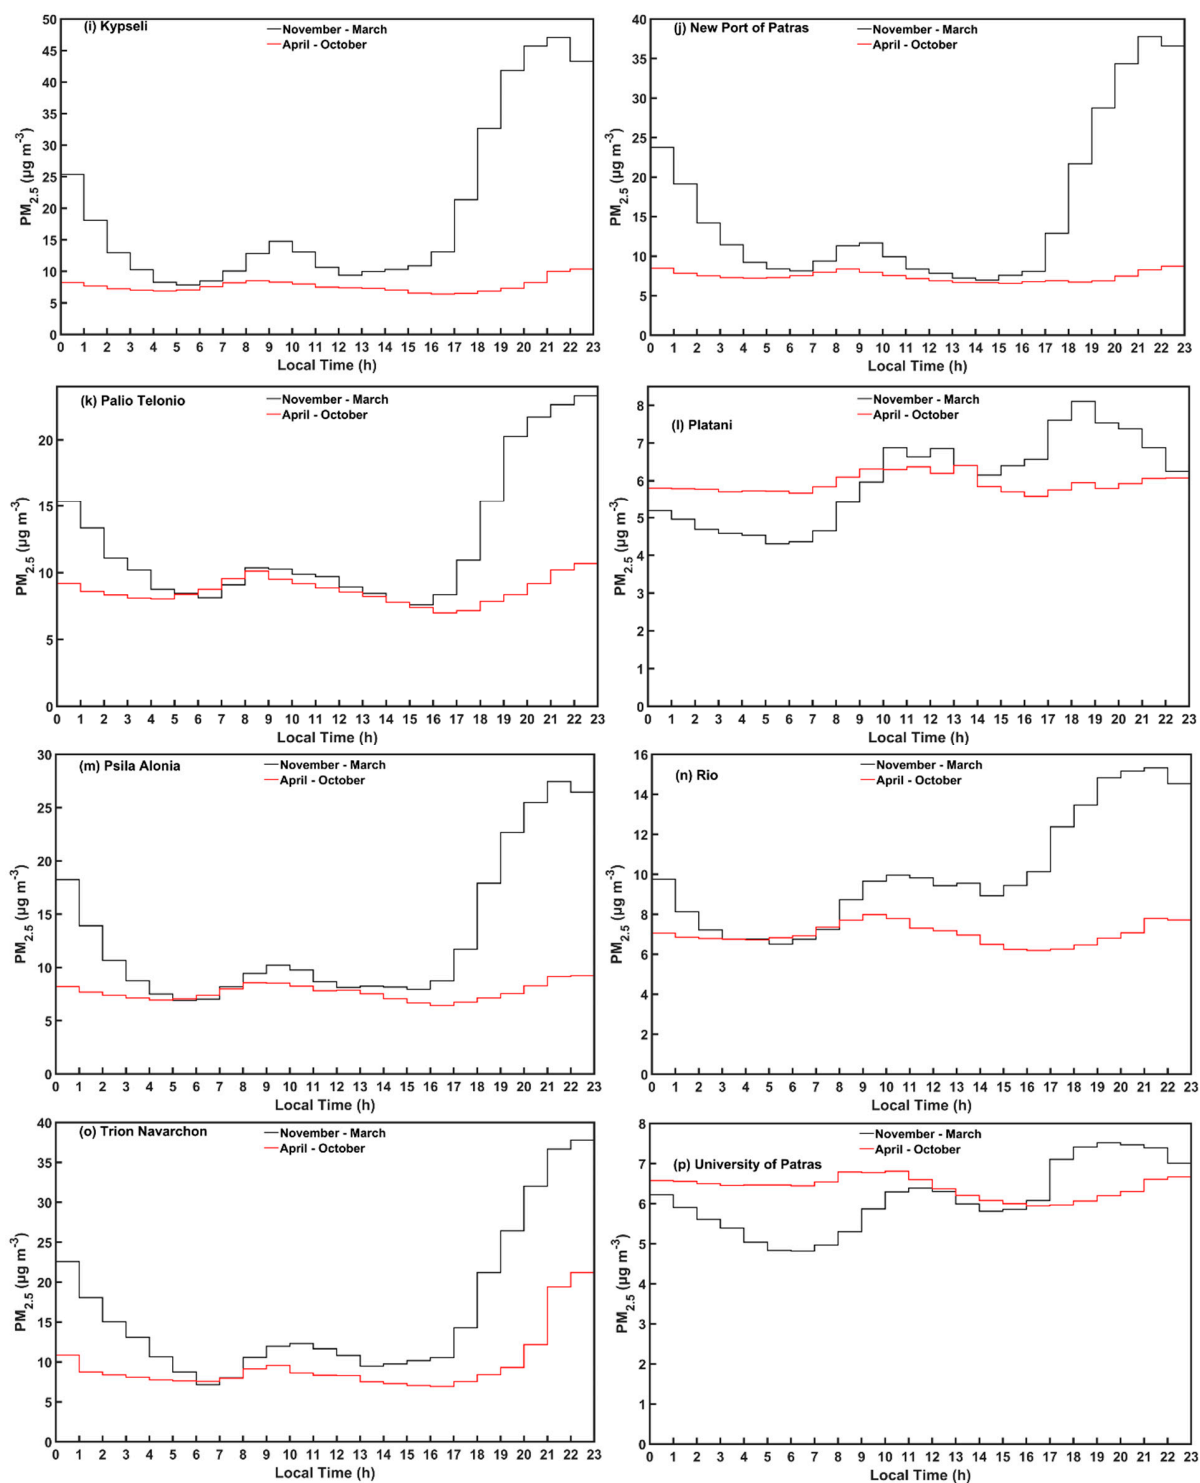

**Figure S1.** Average diurnal variation for each station during the colder (November – March) and warm period (April - October).

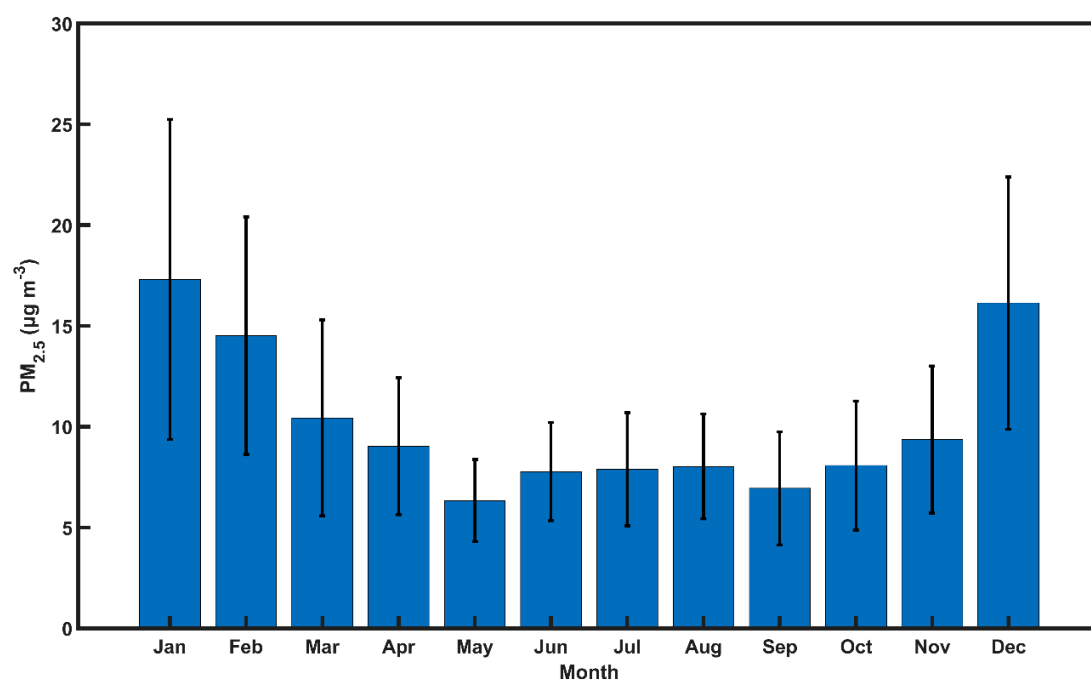

**Figure S2.** Monthly average PM<sub>2.5</sub> concentrations for the city of Patras, Greece during 02/2017 – 12/2019. These are calculated as the averages of all stations excluding the background measurements. Error bars correspond to one standard deviation of the daily average.
